# Supplementary material for: The oneirogen hypothesis: modeling the hallucinatory effects of classical psychedelics in terms of replay-dependent plasticity mechanisms
Source: eLife journal article supplement (doi:10.7554/elife.105968), 2025-06-06
Supplement: supp1 [file elife-105968-supp1-v1.pdf]

| Parameter            | Function                           | Value        |
|----------------------|------------------------------------|--------------|
| $\{N^{(l)}\}$        | Layer Widths                       | [32, 16, 6]  |
| $\sigma_b$           | Inference standard dev.            | 0.01         |
| $\sigma_p$           | Generative standard dev.           | 0.01         |
| $N_d$                | Number of dendritic branches       | 16           |
| $L$                  | Epoch number                       | 50           |
| $T_w$                | Length of Wake phase               | 200          |
| $T_s$                | Length of Sleep phase              | 200          |
| $K$                  | Batch number                       | 512          |
| $\eta_p$             | Generative parameter learning rate | 0.001        |
| $\eta_b$             | Inference parameter learning rate  | 0.001        |
| $[\beta_1, \beta_2]$ | Adam optimizer parameters          | [0.9, 0.999] |

Supplementary File 1: **MNIST multicompartment network hyperparameters**. The hyperparameters used to train our multicompartment neural network model on the MNIST dataset.
