# Supplementary material for: The oneirogen hypothesis: modeling the hallucinatory effects of classical psychedelics in terms of replay-dependent plasticity mechanisms
Source: eLife journal article supplement (doi:10.7554/elife.105968), 2025-06-06
Supplement: supp3 [file elife-105968-supp3-v1.pdf]

| Parameter            | Function                           | Value                            |
|----------------------|------------------------------------|----------------------------------|
| $\{N^{(l)}\}$        | Layer Widths                       | [512, 256, 256, 128, 64, 32, 16] |
| $\sigma_b$           | Denoised inference standard dev.   | 0.01                             |
| $\bar{\sigma}_b$     | Noisy inference standard dev.      | 0.01                             |
| $\sigma_p$           | Denoised generative standard dev.  | 0.01                             |
| $\bar{\sigma}_p$     | Noisy generative standard dev.     | 0.01                             |
| $L$                  | Epoch number                       | 400                              |
| $T_w$                | Length of Wake phase               | 200                              |
| $T_s$                | Length of Sleep phase              | 50                               |
| $K$                  | Batch number                       | 512                              |
| $\eta_p$             | Generative parameter learning rate | 0.001                            |
| $\eta_b$             | Inference parameter learning rate  | 0.0001                           |
| $[\beta_1, \beta_2]$ | Adam optimizer parameters          | [0.9, 0.999]                     |

Supplementary File 3: **Recurrent network hyperparameters.** The hyperparameters used to train our recurrent neural network model on the MNIST dataset.
