# Supplementary material for: The oneirogen hypothesis: modeling the hallucinatory effects of classical psychedelics in terms of replay-dependent plasticity mechanisms
Source: eLife journal article supplement (doi:10.7554/elife.105968), 2025-06-06
Supplement: supp4 [file elife-105968-supp4-v1.pdf]

---

Supplementary File 4: Wake-Sleep Pseudocode

---

```

1:  $e \leftarrow 0$ 
2:  $\mathcal{L}_{prev} \leftarrow \infty$ 
3: while  $e < L$  do ▷ Repeat for  $L$  data epochs
4:   for  $t$  in range(0,  $T_w$ ) do ▷ Wake Phase
5:     for  $k$  in range(0,  $K$ ) do ▷ Sample network states
6:        $\mathbf{r}^{(k)} \sim b(\mathbf{r}, \theta_b)$ 
7:       if epoch is complete then  $e \leftarrow e + 1$ 
8:         end if
9:       end for
10:       $\mathcal{L}(\theta_p) \leftarrow \frac{1}{K} \sum_{k=0}^K -\log p(\mathbf{r}^{(k)}, \theta_p)$  ▷ Update generative parameters  $\theta_p$ 
11:       $\Delta\theta_p \leftarrow \eta_p \nabla_{\theta_p} \mathcal{L}(\theta_p)$ 
12:       $\theta_p \leftarrow \text{Adam}(\theta_p, \Delta\theta_p)$ 
13:    end for
14:    if  $\mathcal{L}(\theta_p) < \mathcal{L}_{prev}$  then
15:       $\mathcal{L}_{prev} \leftarrow \mathcal{L}(\theta_p)$ 
16:      for  $t$  in range(0,  $T_s$ ) do ▷ Sleep Phase
17:        for  $k$  in range(0,  $K$ ) do ▷ Sample network states
18:           $\mathbf{r}^{(k)} \sim p(\mathbf{r}, \theta_p)$ 
19:        end for
20:         $\mathcal{L}(\theta_b) \leftarrow \frac{1}{K} \sum_{k=0}^K -\log b(\mathbf{r}^{(k)}, \theta_b)$  ▷ Update inference parameters  $\theta_b$ 
21:         $\Delta\theta_b \leftarrow \eta_b \nabla_{\theta_b} \mathcal{L}(\theta_b)$ 
22:         $\theta_b \leftarrow \text{Adam}(\theta_b, \Delta\theta_b)$ 
23:      end for
24:    end if
25: end while

```

---
